# Supplementary material
Source: Springer Nature journal article supplement (https://www.springermedizin.de/resource/supplementary/12879_2012_2193_MOESM2_ESM.pdf/9443672)

# Distribution of Spots

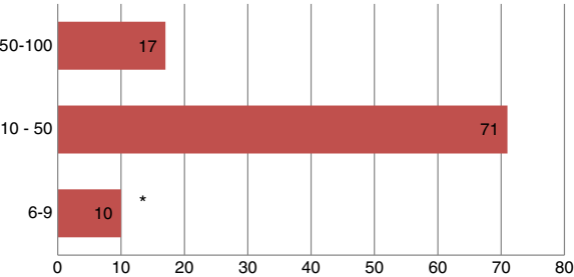

Supplement: MOESM2 [file 9443672]
